# Supplementary material for: Evaluation of an Imine-Linked Polymer Organic Framework for Storage and Release of H2S and NO
Source: MDPI journal article supplement (doi:10.3390/ma16041655), 2023-02-16
Supplement: s1 [file s1]

## **Evaluation of an imine-linked polymer organic framework for storage and release of H<sub>2</sub>S and NO**

Sílvia Carvalho<sup>1,2\*</sup>, Cristina Moiteiro<sup>2</sup>, João Pires<sup>2</sup>, and Moisés L. Pinto<sup>1\*</sup>

<sup>1</sup>CERENA, Departamento de Engenharia Química, Instituto Superior Técnico, Universidade de Lisboa, Campus Alameda, 1049-001 Lisboa, Portugal

<sup>2</sup>CQE, Centro de Química Estrutural, Institute of Molecular Sciences, Departamento de Química e Bioquímica, Faculdade de Ciências, Universidade de Lisboa, Campo Grande, 1749-016 Lisboa, Portugal.

\* Correspondence: [silvia.carvalho@tecnico.ulisboa.pt](mailto:silvia.carvalho@tecnico.ulisboa.pt) (S.C.); [moises.pinto@tecnico.ulisboa.pt](mailto:moises.pinto@tecnico.ulisboa.pt) (M.L.P)

## S1. H<sub>2</sub>S release in aqueous solution

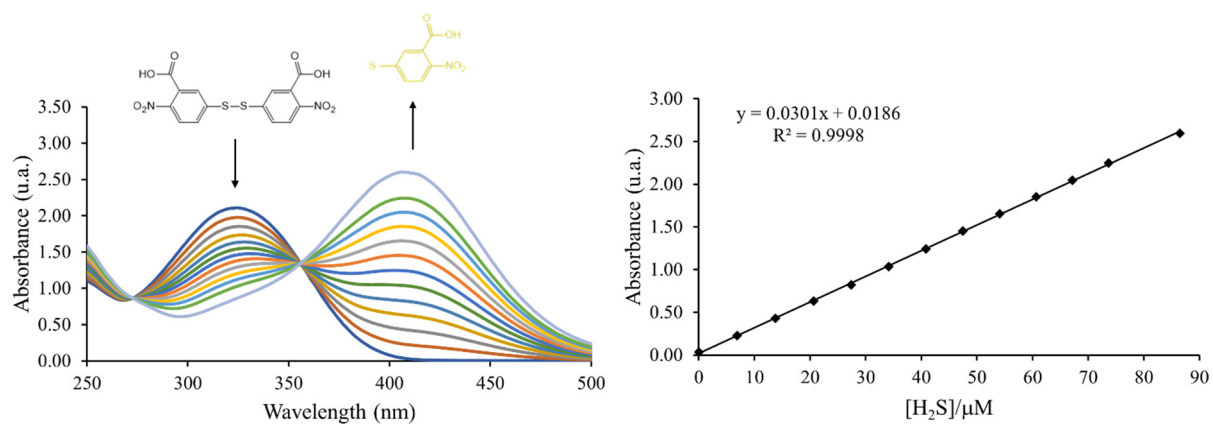

**Figure S1.** UV-Vis spectra of the DTNB (decreasing) and 5-thio-2-nitrobenzoate (increasing) (left) and calibration curve (right) obtained using a Na<sub>2</sub>S solution.

## S2. FTIR data

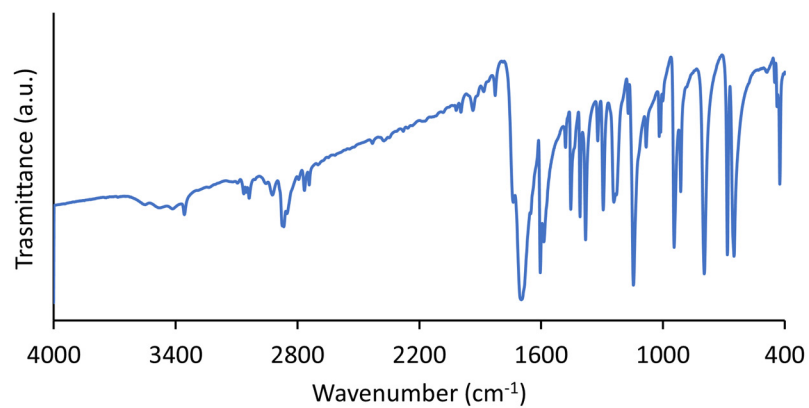

**Figure S2.** FTIR spectra of isophthalaldehyde.

### S3. TG-DSC

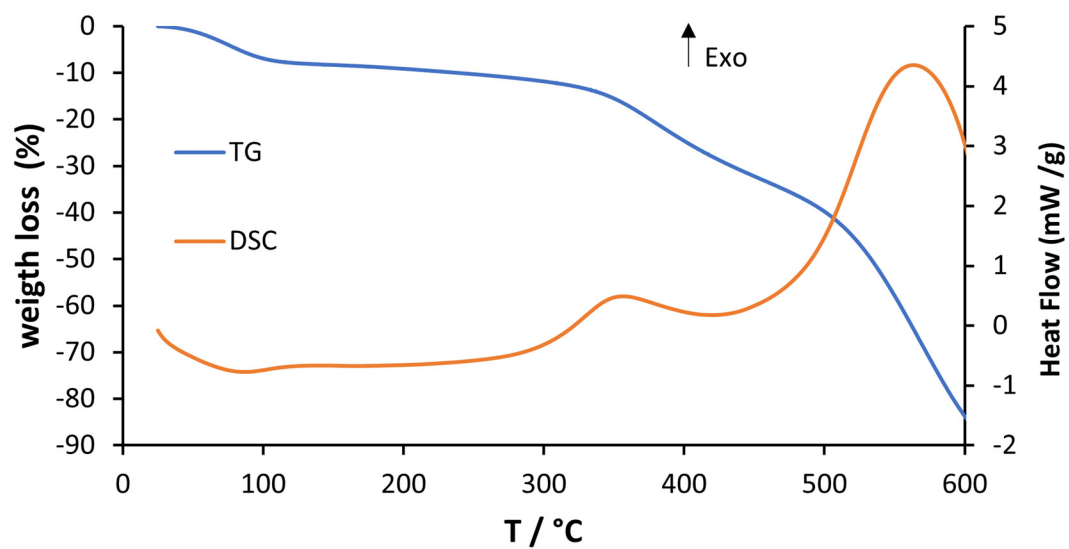

**Figure S3.** Thermogravimetry (blue line) and Differential Scanning Calorimetry (orange line) of the studied material.
